# Supplementary material
Source: Springer Nature journal article supplement (https://www.springermedizin.de/resource/supplementary/13046_2012_562_MOESM6_ESM.pdf/9662454)

# All patients

**BAG-1**

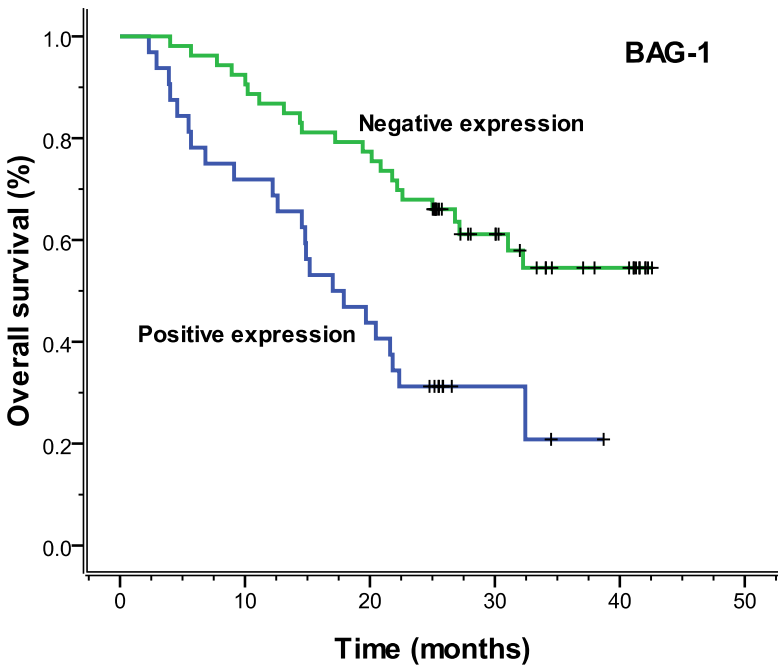

Supplement: MOESM6 [file 9662454]
